# Supplementary material
Source: MDPI journal article supplement (https://www.mdpi.com/2673-9992/14/1/23)
Supplement: s1 [file s1]

# SYNTHESIS OF AZETIDINE-BASED $\beta$ -AMINO ALCOHOLS

LINDA SUPE<sup>1</sup>, ILGA MUTULE<sup>1</sup>, TORE BENGTTSSON<sup>2</sup>, BENJAMIN PELCMAN<sup>3</sup>

<sup>1</sup> Latvian Institute of Organic Synthesis, Aizkraukles 21, Riga, Latvia

<sup>2</sup> Department of Molecular Biosciences, The Wenner-Gren Institute, Stockholm University, Svante Arrhenius väg 20C, 106 91 Stockholm, Sweden

<sup>3</sup> Atrogi AB, Tomtebodavägen 6, 171 65 Solna, Sweden

Email: linda\_supe@osi.lv

## Abstract

(Azetidine-2-yl)aryl alcohols promote glucose uptake in skeletal muscle cells and are promising for use in treatment of hyperglycaemia.<sup>1</sup> Our objective was development of synthetic pathway towards all possible isomers of 4,4-dimethylazetidin-2-yl (hetero)aryl alcohols **6** starting from commercially available 2-amino-2-methylpropan-1-ol **1**.

## Synthetic route to enantiopure 4,4-dimethylazetidin-2-yl (hetero)aryl alcohols **6a-d**

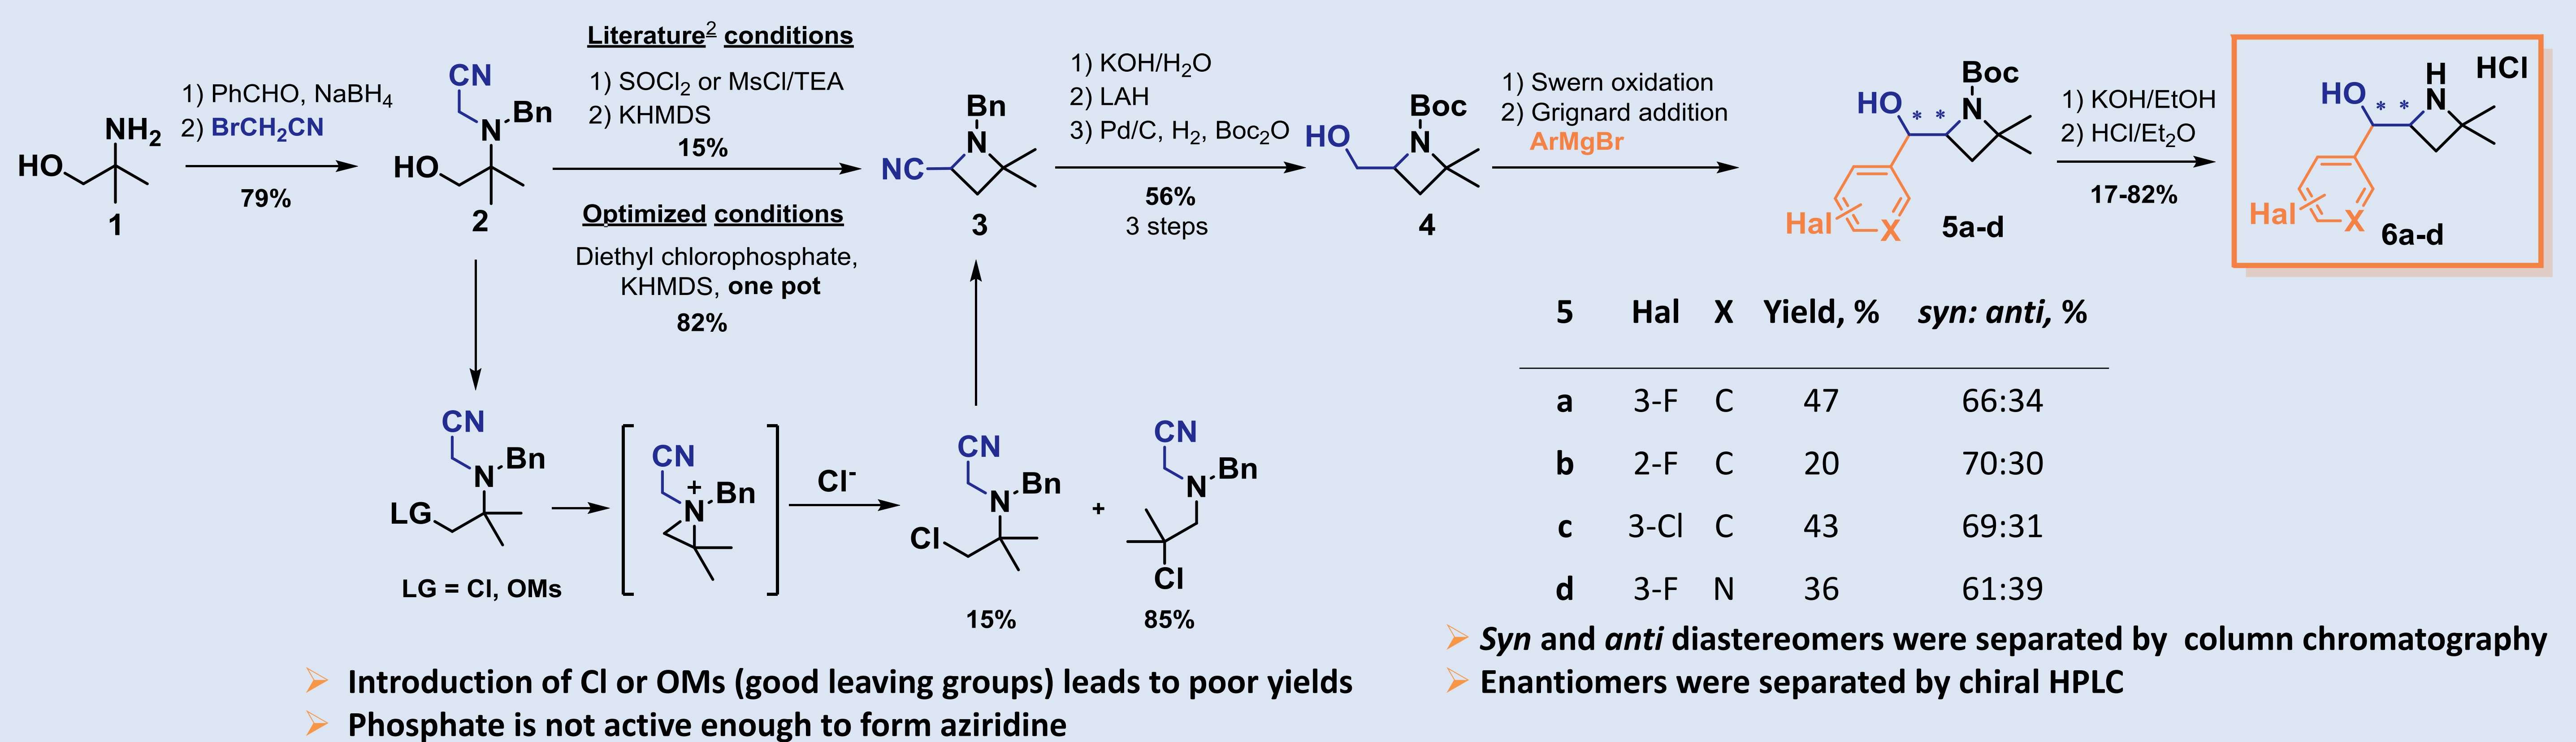

## Focused synthesis of *R,R*-**6a**

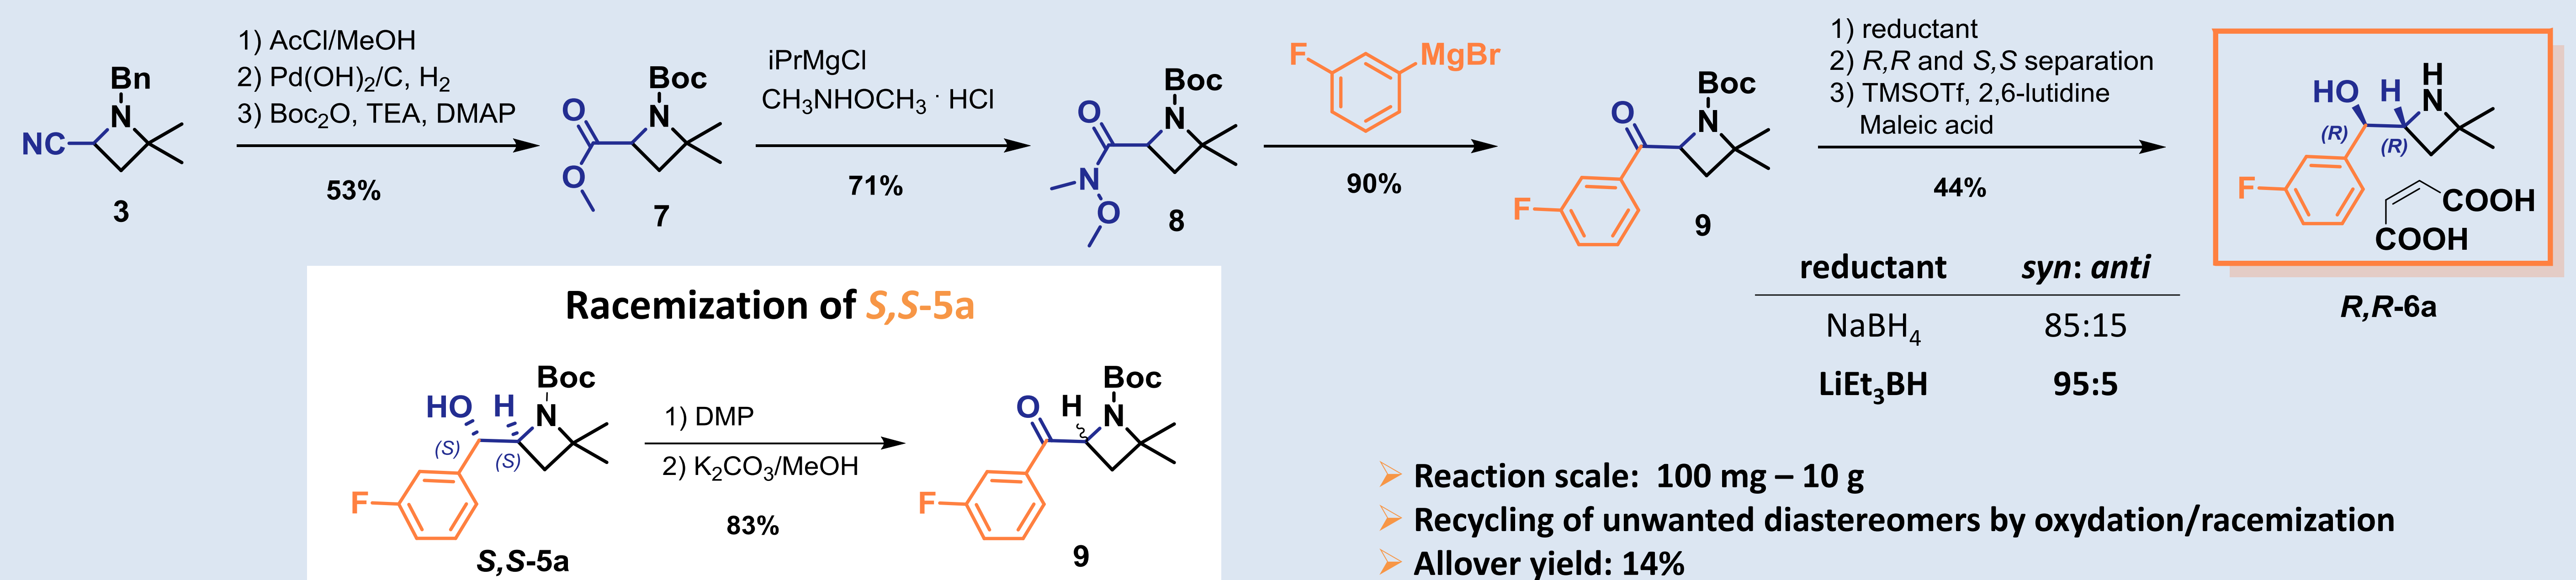

## Syn and anti distinction

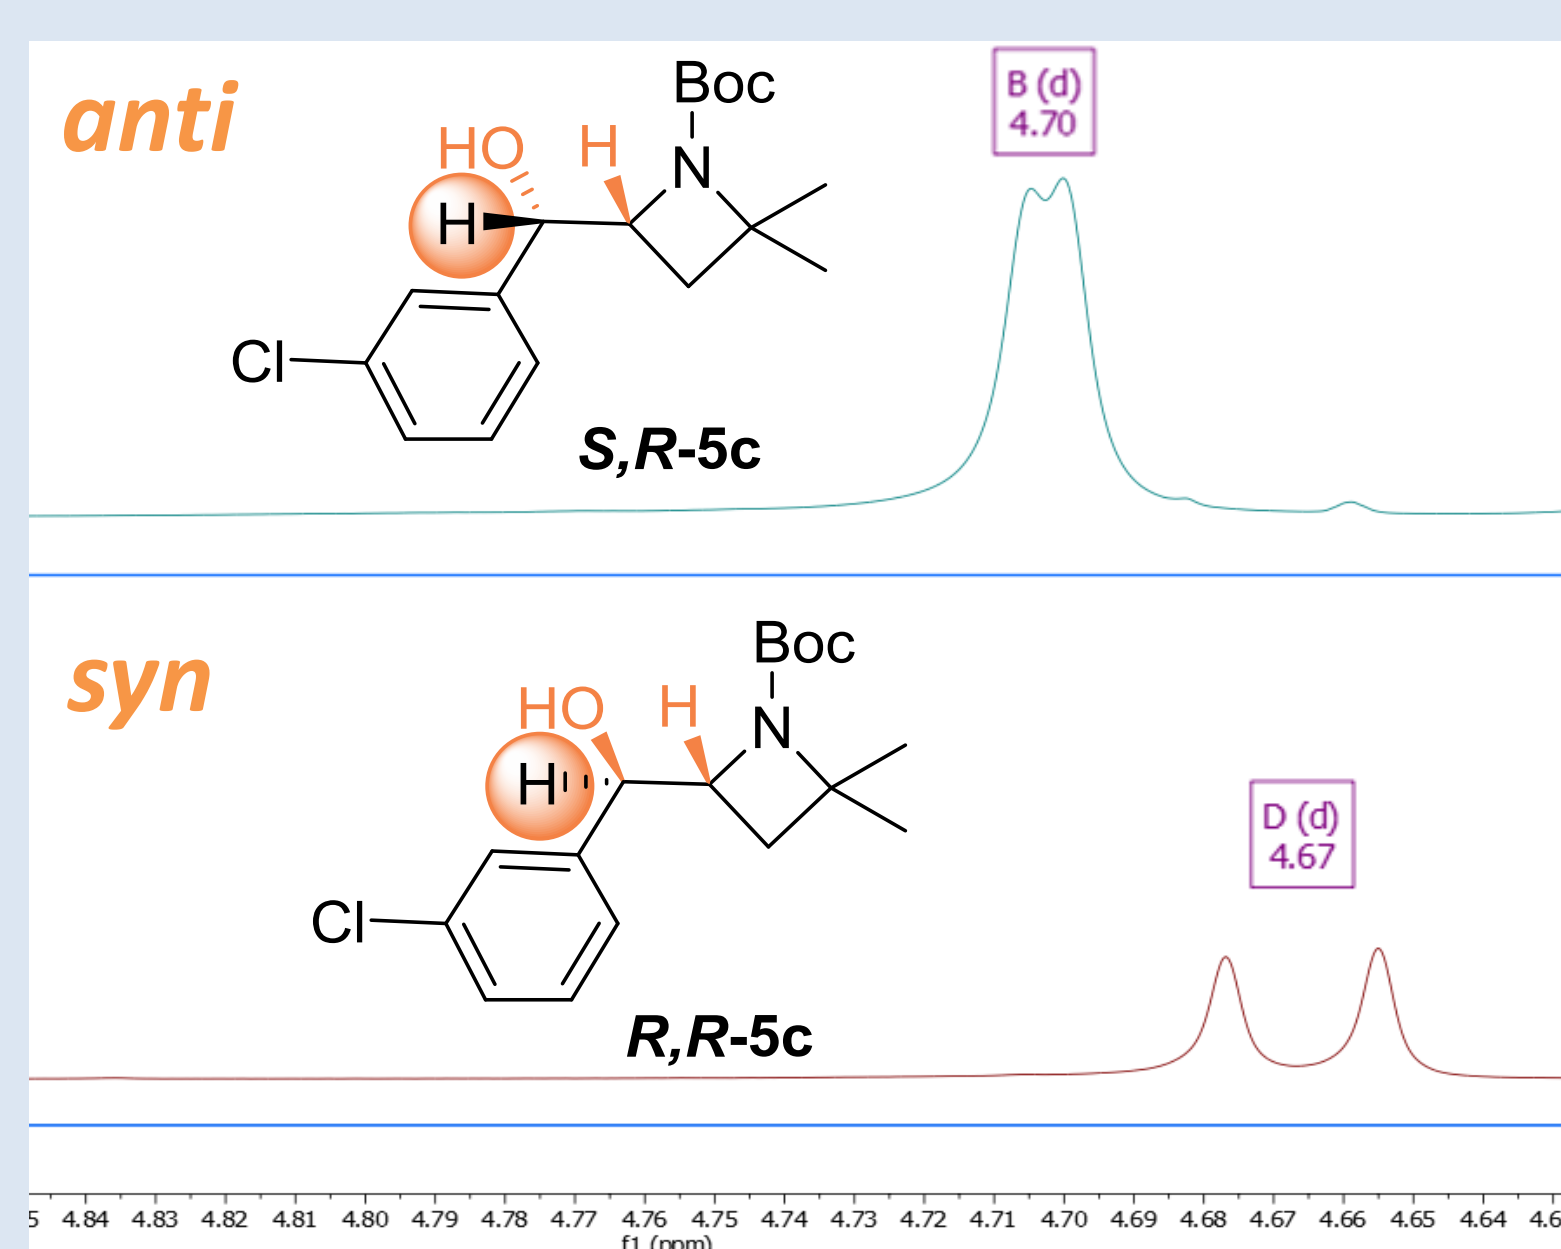

## Summary

Synthetic pathway to obtain all 4 isomers of 4,4-dimethylazetidin-2-yl (hetero)aryl alcohols **6a-d** was developed successfully. Asymmetric scalable synthesis towards *syn* alcohols with yield improvement was developed.

Synthesized compounds showed good activity towards target receptors and further biological evaluation is currently under progress.

## Absolute configuration

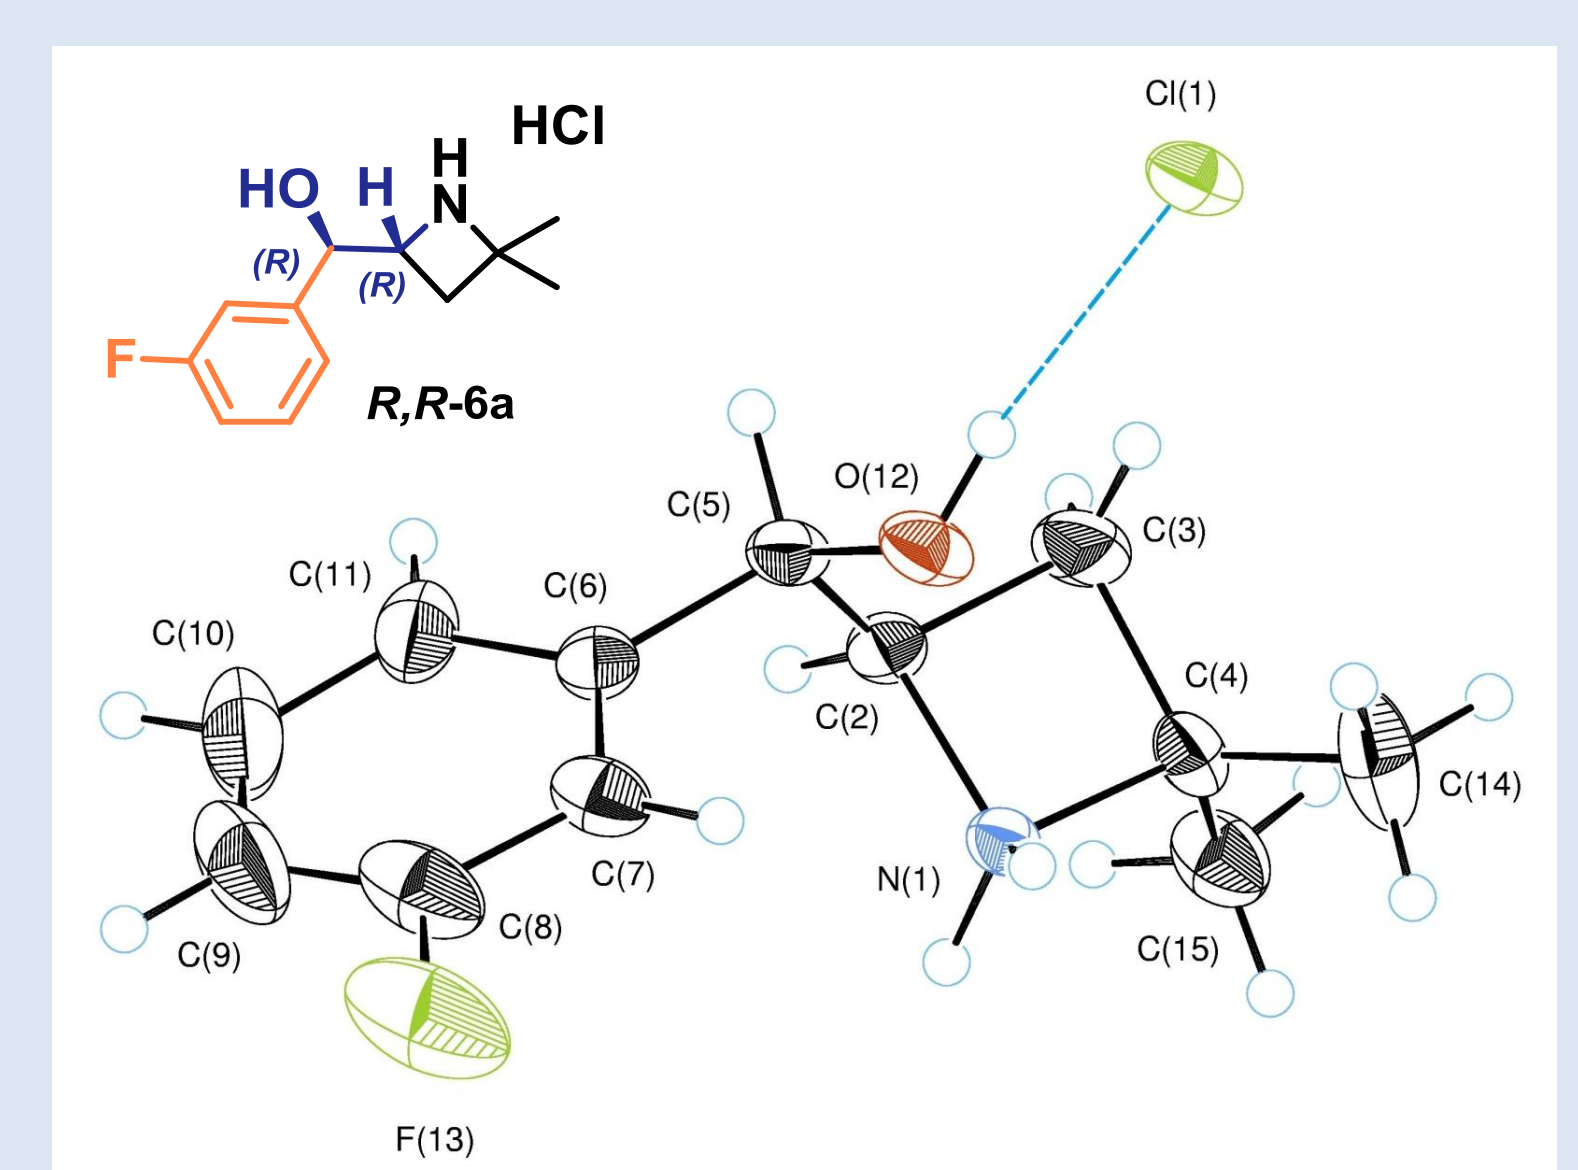

## References

- Pelcman, B.; Bengtsson, T. WO2020188299 A1, September 24, 2020.
- Agami, C., Couty, F., Evano, G. *Tetrahedron Asymmetry* **2002**, *13*, 297.

## Acknowledgement

This research was funded by the European Regional Development Fund (Grant No. 1.1.1.2/VIAA/4/20/755)

ECMC  
2022

The 8th International Electronic  
Conference on Medicinal Chemistry  
01-30 NOVEMBER 2022 | ONLINE
